# Supplementary material
Source: PubMed Central journal article supplement (PMC10112157)
Supplement: aac.00037-23-s0001.pdf [file aac.00037-23-s0001.pdf]

## **Supplementary Appendix**

### Table of Contents:

|                       |            |
|-----------------------|------------|
| Materials and Methods | Pages 2-4  |
| Results               | Pages 5    |
| Tables and Figure     | Pages 6-13 |
| References            | Page 14    |

### Investigators:

Tram Le, Sue C. Nang, Jian Li, Jinxin Zhao, Heidi H. Yu, Jason J. Gill, Mei Liu, Saima Aslam

## Materials and Methods

### ***K. pneumoniae* identification, antibiogram, and phage susceptibility**

Urine samples were plated on blood and MacConkey agar plates and incubated at 37°C. The resulting bacterial growth was quantified using semi-quantitative technique. Microbial identity of the bacteria was determined using MALDI-TOF mass spectrophotometry (Bruker). Antibiotic susceptibility was tested using the microbroth dilution technique by the Phoenix system (BD) at the UCSD clinical microbiology laboratory.

Phage susceptibility of the bacterial isolates was determined by spotting of 10 µl serially diluted phage suspensions onto bacterial lawns produced using the soft agar overlay method [1], and incubating the spotted plates at 37°C for 24 h to observe plaque formation. Efficiency of plating (EOP) was determined by comparing the phage titer on the clinical isolate against the titer on its original propagation host.

Determination of extended spectrum beta lactamase (ESBL) production was made using phenotypic assays for non-blood isolates and using genotypic assay for the CTX-M gene (Verigene) for blood isolates.

### **Genome sequencing and analysis of *Klebsiella* clinical isolates**

Genomic DNA of the *Klebsiella* isolates were extracted using a Qiagen DNeasy Blood Tissue Kit as per the manufacturer's instruction. NanoDrop 2000 (Thermo Fisher Scientific, USA) and Qubit 3.0 (Thermo Fisher Scientific, USA) were used to quantify and validate the DNA quality. Sequencing libraries were prepared with the NEBNext Ultra DNA Library Prep kit and were sequenced to at least 300-fold coverage using an Illumina HiSeq 2500 (Azenta Life Sciences, Suzhou, China). Raw reads were trimmed using trimmomatic v0.38 [2] and assembled using SPAdes v3.15.3 [3]. Antibiotic resistance genes (ARGs) were identified using ABRicate v0.8.13 [4]. The capsule (K) locus was identified using Kaptive v0.5.1 [5]. The sequence type of the strains was determined by MLST v2.15 [6]. Core-SNP alignments were detected by comparing 722 genomes using Roary v3.11.2 (<https://sanger-pathogens.github.io/Roary/>). A phylogenetic tree based on genome-wide comparison was constructed from the core-SNP alignment with a GTR model and ascertainment bias correction using IQ-TREE 2 and then visualized using ggtree v3.6.2.

### **Phage propagation and genomic characterization**

The isolation of phages Mineola and Metamorpho and their genome sequencing and annotations were reported previously [7, 8]. Phage pkp20 was isolated from raw sewage sample obtained in Melbourne, Australia; its genomic DNA was extracted using phenol-chloroform method and sequenced via Illumina HiSeq sequencing (150 bp pair-end), and the sequence reads were assembled using SPAdes v3.5.0 [3]. The isolation, propagation, and titring of all three phages were conducted using the soft agar overlay method [1]. All three phage genome sequences were completed with PCR primers to face off the ends of the assembled contig and Sanger sequencing of the resulting products. Genome analyses were carried out on the Center for Phage Technology (CPT) Galaxy and Apollo interfaces [9] with tools at default settings (<https://cpt.tamu.edu/galaxy-pub>). DNA similarity between the phage genomes was determined

using ProgressiveMauve [10]. ICTV taxonomy placement is based on nucleotide similarity determined by BLASTn against NCBI nt database.

### **Phage cross-resistance testing**

Phage-resistant mutants against phages Mineola, Metamorpho, or pkp20 were generated by plating each undiluted phage lysates ( $\sim 10^{10}$  pfu/ml, 100  $\mu$ l) onto lawns of the clinical ESBL *K. pneumoniae* isolate C4023081 (isolated on 03/2021). Following overnight incubation at 37 °C, the emerged individual colonies were picked (eight colonies against each phage) and streaked onto fresh TSA plates to purify. The purified phage resistant mutants were tested for their susceptibility to phages Mineola, Metamorpho, and pkp20 by spotting 10  $\mu$ l of serial diluted phage samples onto the bacterial lawns. EOP was calculated when phage susceptibility was observed.

### **Virulence assays using single and mixed phages**

Fresh overnight culture of ESBL *K. pneumoniae* isolate C5012365 (April 2021, the most recent host when the virulence assay was conducted) was adjusted with TSB to OD<sub>600</sub>  $\sim$  0.1 to achieve a concentration of  $\sim 10^8$  cfu/ml. Phage lysates were tittered and adjusted to concentrations of  $10^8$  pfu/ml and  $10^7$  pfu/ml. For each assay, 180  $\mu$ l of adjusted bacterial suspension in TSB was mixed with 20  $\mu$ l of adjusted phage suspension in sterile, untreated Falcon (Corning) 96-well transparent plates to achieve final multiplicity of infection (MOI) of 0.1 and 0.01, respectively. The plate was incubated in a Tecan Spark 10 M plate reader (Tecan Group Ltd., Männedorf, Switzerland) at 37°C for 20 h with continuous shaking. The growth of the host (OD<sub>600</sub>) was measured at 30-min intervals. Growth curves were obtained by plotting OD after baseline adjustment against time. The assays were performed with two biological replicates.

### **Phage purification for clinical administration**

Propagation and purification of phages for clinical administration were carried out as described previously [11]. Briefly, phages were propagated on *K. pneumoniae* isolate C4023081 in TSB, and the harvested phage lysates were concentrated by centrifugation. The re-suspended phage pellets were purified using cesium chloride (CsCl) isopycnic gradient centrifugation, followed by dialysis. The dialyzed phages underwent further endotoxin removal using Biovendo Endotrap HD 5/1 columns, and endotoxin levels were quantified using the Biovendo EndoZyme II recombinant factor C assay. The final purified single phages were diluted and dialyzed in Lactated Ringer's to the final concentration of  $5 \times 10^{10}$  pfu/ml, and the phage suspensions were filtered through 0.22  $\mu$ m filters and tested for sterility (USP71 test) at Nova Biologicals (Conroe, TX). The stability of individual phages and the cocktail stored in refrigerated conditions was tested weekly by phage titering. The three sterile single phage suspensions were mixed at equal volumes weekly to formulate enough phage cocktail for one-week's injection.

### **Phage pharmacokinetics on Day 1 of phage treatment**

At the start of phage treatment (Day 1), patient serum samples were collected at different time points (baseline, 15, 30, 45, 60, and 120 min) following phage injection. Serial dilutions of the serum samples were spotted (10  $\mu$ l / spot) on the soft agar bacterial lawn prepared using *K. pneumoniae* isolate C4023081. Phage inactivation half-life was determined using the non-compartmental analysis on PK Solver [12].

### **Neutralization of phage in patient samples**

The neutralization of phages was tested by spiking the clinical patient samples (serum or urine) with phage stocks at 1:10 phage to serum ratio, to reach a starting phage level of  $\sim 10^9$  pfu/ml in each sample. The spiked samples were incubated at room temperature, and dilutions were made from the spiked samples at different time points (0, 5, 10, 20, 25, 30, 40, 60, 90 min). From each dilution, 10  $\mu$ l was spotted on the bacterial lawn prepared using *K. pneumoniae* isolate C4023081 and the spotted plates were incubated at 37 °C for 24 h to observe plaques. Phage inactivation half-life was determined using the non-compartmental analysis on PK Solver [12].

### **Bacterial population in urine samples during phage treatment**

Urine samples collected at the start of the phage administration, and several follow up samples were analyzed for total microbe counts, as well as the microbial identity. Serial dilutions of the urine samples were plated on TSA plates to enumerate the total microbe levels. From the plates, isolated colonies representing different morphologies were picked and were subjected to colony PCR to amplify the 16s rRNA genes using primers 27F (5'-AGAGTTTGATCCTGGCTCAG-3') and 1492R (5'-GGTTACCTTGTTACGACTT-3'). The obtained PCR products were sequenced via Sanger sequencing and results were analyzed by BLASTn against the NCBI nr database. The urine samples were also centrifuged (8,000  $\times$  g, 10 min) to pellet microbial cells. Total DNA was extracted from each pellet and was subjected to 16S metagenomic population sequencing at Microbial Genome Sequencing Center (Pittsburgh, PA). Briefly, the 16S DNA samples were prepared using Qiagen's QIAseq phased primers targeting the V3/V4 regions of the 16S gene and were sequenced on a V3 MiSeq 600cyc flowcell to generate 2x276bp PE reads. Reads QC was performed with the Illumina BCL Convert, and subsequent analysis were done using Qiime2 [13]. Operational taxonomic units (OTUs) were assigned using the Silva 138 99% OTUs full-length sequence database [14] and the VSEARCH [15] utility within Qiime2's feature-classifier plugin. OTUs were then collapsed to their lowest taxonomic units, and their counts were converted to reflect their relative frequency within a sample.

### **NCBI accession numbers**

The complete genome sequences of *K. pneumoniae* phages Mineola, Metamorpho and pkp20 were deposited in GenBank under the accession numbers [MH333064](#), [MT701588](#) and [OP331213](#), respectively.

## Results

### Characterization of phages and assembly of phage cocktail

In March-April 2021, a total of 111 *Klebsiella* phages (three from Monash University and 108 from Texas A&M) were screened against four ESBL *K. pneumoniae* clinical isolates from the patient (isolates from Sept 2020, Oct 2020, Jan 2021 and March 2021, see Table S1) in order to develop the phage treatment. Seventeen phages that showed activity against any of the tested isolates were further tested for their EOP on the clinical isolates compared to the phage's original propagation host. Three phages, Metamorpho, Mineola, and pkp20, showed no decrease in EOP on the most recent clinical isolates at the time of cocktail assembly (strains isolated in March and April 2021), and these phages were selected to assemble the treatment cocktail. Phages Metamorpho and Mineola were isolated from wastewater samples collected from different towns in Texas (Madisonville and Bryan, respectively) [7, 8], and phage pKp20 was isolated from sewage sample in Melbourne, Australia. Genomes of the three phages were sequenced to completion, and their genome features are summarized in Table 1. The three phages share significant DNA similarity with each other (75.9%-91.9%, Figure 1A), as well as with other T4-like phages such as *Klebsiella* phage JD18 ([KT239446](#)). Based on their sequence relationships to other phages and the criteria of the International Committee on Taxonomy of Viruses (ICTV) [16], these three phages can be assigned to species in the genus *Jiaodavirus* within subfamily *Tevenvirinae* (Table 1). The typical T4-like genomes of these three phages indicate their virulent lifestyle. No integrase genes indicating a temperate lifestyle, nor genes associated with antibiotic resistance or virulence were identified in any of these phages.

The ESBL *K. pneumoniae* isolate C4023081 (isolated in March 2021) was used to generate mutants resistant to each of these three phages. Eight resistant mutants were generated for each phage and these were tested to their sensitivity to the other two cocktail phages. All mutants resistant to pkp20 and Mineola were also resistant to Metamorpho, although Metamorpho was able to produce plaques at an extremely low frequency ( $10^{-8}$ ~ $10^{-9}$ ) on these mutants, suggesting an avenue for mutation to overcome resistance. Mutants resistant to Metamorpho were also resistant to pkp20 and Mineola with plaques observed at any dilution. When tested for virulence *in vitro*, the individual phages and phage cocktail demonstrated effective inhibition of the host growth at an MOI of 0.01, with regrowth of presumably phage-resistant bacteria after approximately 5 h, as is often observed in these types of assays [17] (Figure 1). A virulence assay run with an MOI of 0.1 generated similar results and the data is not shown.

Phages were propagated and purified individually to remove endotoxin and stored in lactated Ringer's ( $5 \times 10^{10}$  pfu/ml) at 4°C, which demonstrated stability throughout treatment duration (data not shown). However, phage cocktail with mixed phages showed titer decrease (up to 85%) after one week and further decrease (up to 10-fold) after two weeks' storage at 4°C. For this reason, individual phages were mixed at equal volumes weekly to formulate the phage cocktail with an average endotoxin level of 3.87 EU/dose ( $5 \times 10^9$  pfu/dose).

**Table S1. Clinical episodes, clinical microbiology, and administered treatments over a 2-year period.**

| <b>Date</b>                                              | <b>Clinical episode</b>                                                                                  | <b>Treatment</b>                                                                    | <b>Microbiology (urine culture)</b>                                                                                                                                                     |
|----------------------------------------------------------|----------------------------------------------------------------------------------------------------------|-------------------------------------------------------------------------------------|-----------------------------------------------------------------------------------------------------------------------------------------------------------------------------------------|
| <b>March 2020</b>                                        | Post-operative cystitis                                                                                  | Cefpodoxime x 5d                                                                    | <i>Citrobacter freundii</i>                                                                                                                                                             |
| <b>March 2020</b>                                        | Asymptomatic bacteriuria                                                                                 | Not treated                                                                         | <i>C. freundii</i> and vancomycin-resistant <i>Enterococcus faecium</i> (VRE)                                                                                                           |
| <b>May 2020</b>                                          | Asymptomatic bacteriuria                                                                                 | Not treated                                                                         | <i>C. freundii</i>                                                                                                                                                                      |
| <b>June 2020 (3 separate weekly cultures)</b>            | Asymptomatic bacteriuria                                                                                 | Not treated                                                                         | <i>C. freundii</i>                                                                                                                                                                      |
| <b>June 2020</b>                                         | Asymptomatic bacteriuria                                                                                 | Not treated                                                                         | ESBL <i>Klebsiella pneumoniae</i> and <i>C. freundii</i>                                                                                                                                |
| <b>July 2020</b>                                         | #1 Asymptomatic bacteriuria<br>#2 Asymptomatic bacteriuria<br>#3 Admitted with transplant pyelonephritis | #1 Not treated<br>#2 Not treated<br>#3 Initially meropenem and then ertapenem x 14d | #1 ESBL <i>K. pneumoniae</i> and <i>C. freundii</i> .<br>#2 ESBL <i>K. pneumoniae</i> and <i>C. freundii</i> .<br>#3 ESBL <i>K. pneumoniae</i> in urine culture, blood culture negative |
| <b>September 2020 (3 separate weekly urine cultures)</b> | #1 Cystitis<br>#2 Asymptomatic bacteriuria<br>#3 Asymptomatic bacteriuria                                | #1 Fosfomycin x6d<br>#2 not treated<br>#3 not treated                               | #1 ESBL <i>K. pneumoniae</i><br>#2 ESBL <i>K. pneumoniae</i><br>#3 ESBL <i>K. pneumoniae</i>                                                                                            |
| <b>October 2020 (2 separate weekly cultures)</b>         | #1 Asymptomatic bacteriuria<br>#2 Admitted with transplant pyelonephritis and bacteremia                 | #1 Not treated<br>#2 Ertapenem x 14d followed by nitrofurantoin suppression         | #1 ESBL <i>K. pneumoniae</i><br>#2 ESBL <i>K. pneumoniae</i> in urine and blood cultures                                                                                                |
| <b>December 2020</b>                                     | #1 Cystitis leading to Emergency Room visit                                                              | #1 Ertapenem x 7d (previous nitrofurantoin discontinued)                            | <i>K. pneumoniae</i>                                                                                                                                                                    |
| <b>January 2021</b>                                      | #1 Asymptomatic bacteriuria<br>#2 Admitted with septic shock 5 days                                      | #1 not treated<br>#2 ceftriaxone x14d                                               | #1 <i>K. pneumoniae</i><br>#2 Blood and urine cultures negative                                                                                                                         |

|                                             |                                                                                                      |                                                                                                                |                                       |
|---------------------------------------------|------------------------------------------------------------------------------------------------------|----------------------------------------------------------------------------------------------------------------|---------------------------------------|
|                                             | after positive urine culture                                                                         |                                                                                                                |                                       |
| <b>February 2021</b>                        | Cystitis                                                                                             | Bactrim DS twice daily x7 days followed by once daily suppression                                              | Culture not done                      |
| <b>March 2021</b>                           | #1 Cystitis                                                                                          | #1 Fosfomycin x6 days (2 doses). Bactrim suppression stopped                                                   | #1 ESBL <i>K. pneumoniae</i>          |
|                                             | #2 Asymptomatic bacteriuria                                                                          | #2 No treatment                                                                                                | #2 ESBL <i>K. pneumoniae</i>          |
|                                             | #3 Cystitis                                                                                          | #3 Ertapenem x7d                                                                                               | Culture not done                      |
| <b>April 2021</b>                           | Cystitis                                                                                             | Ertapenem x7d                                                                                                  | ESBL <i>K. pneumoniae</i> x2 isolates |
| <b>May 2021</b>                             | Probable transplant pyelonephritis following kidney biopsy                                           | Initially ertapenem x 6d followed by cefpodoxime x8d. Then placed on Bactrim DS three times a week suppression | <i>Escherichia coli</i>               |
| <b>August 2021</b>                          | Cystitis                                                                                             | Ciprofloxacin x 5d; Bactrim suppression stopped.                                                               | ESBL <i>K. pneumoniae</i>             |
| <b>September 2021</b>                       | Cystitis                                                                                             | Ciprofloxacin x5d                                                                                              | <i>K. pneumoniae</i> x 2 isolates     |
| <i>K. pneumoniae</i> directed Phage Therapy |                                                                                                      |                                                                                                                |                                       |
| <b>Phage Day 1</b>                          | Asymptomatic bacteriuria                                                                             | Not treated                                                                                                    | <i>E. faecalis</i>                    |
| <b>Phage Day 8</b>                          | No urinary symptoms                                                                                  | No antibiotics                                                                                                 | Urine culture negative                |
| <b>Phage Day 15</b>                         | No urinary symptoms                                                                                  | No antibiotics                                                                                                 | Urine culture negative                |
| <b>Phage Day 22</b>                         | Initially asymptomatic but then developed symptoms 2 days later with positive urinalysis and culture | Ciprofloxacin x 5d                                                                                             | <i>E. coli</i>                        |
| <b>End of Phage therapy, Day 29</b>         | No urinary symptoms                                                                                  | No antibiotics                                                                                                 | Urine culture negative                |
| <b>Nov 2021</b>                             | No urinary symptoms                                                                                  | No antibiotics                                                                                                 | Urine culture negative                |
| <b>Dec 2021</b>                             | No urinary symptoms                                                                                  | No antibiotics                                                                                                 | Urine culture negative                |
| <b>Jan 2022</b>                             | No urinary symptoms                                                                                  | No antibiotics                                                                                                 | Urine culture negative                |

|                   |                            |                                       |                                                  |
|-------------------|----------------------------|---------------------------------------|--------------------------------------------------|
| <b>Jan 2022</b>   | No urinary symptoms        | No antibiotics                        | Urine culture negative                           |
| <b>Feb 2022</b>   | No urinary symptoms        | No antibiotics                        | Urine culture negative                           |
| <b>Mar 2022</b>   | No urinary symptoms        | No antibiotics                        | Urine culture negative                           |
| <b>April 2022</b> | Cystitis                   | Ceftriaxone -><br>Augmentin x5d       | <i>K. pneumoniae</i>                             |
| <b>May 2022</b>   | #1 Cystitis<br>#2 Cystitis | #1 Keflex x 7d<br>#2 ciprofloxacin x5 | #1 <i>K pneumoniae</i><br>#2 <i>K pneumoniae</i> |



**Table S2. Results of antibiotic susceptibility testing of *K. pneumoniae* isolates as performed by the Phoenix system (BD) in the UCSD clinical microbiological laboratory.**

| Isolation date (mon-year) | ESBL | Amikacin | Ampicillin | Ampicillin-Sulbactam | Cefazolin | Cefepime | Cefoxitin | Ceftazidime | Ceftaz-Tazobactam | Ceftiozone | Ciprofloxacin | Ertapenem | Fusidic acid | Genamycin | Meropenem | Meropenem/vaborbactam | Nitrofurantoin | Piperacillin-Tazobactam | Tobramycin | Trimethoprim-Sulfamethoxazole |
|---------------------------|------|----------|------------|----------------------|-----------|----------|-----------|-------------|-------------------|------------|---------------|-----------|--------------|-----------|-----------|-----------------------|----------------|-------------------------|------------|-------------------------------|
| Jun-20                    | yes  |          |            |                      |           |          |           |             |                   |            |               |           |              |           |           |                       |                |                         |            |                               |
| Jul-20                    | yes  |          |            |                      |           |          |           |             |                   |            |               |           |              |           |           |                       |                |                         |            |                               |
| Jul-20                    | yes  |          |            |                      |           |          |           |             |                   |            |               |           |              |           |           |                       |                |                         |            |                               |
| Jul-20                    | yes  |          |            |                      |           |          |           |             |                   |            |               |           |              |           |           |                       |                |                         |            |                               |
| Jul-20                    | yes  |          |            |                      |           |          |           |             |                   |            |               |           |              |           |           |                       |                |                         |            |                               |
| Sep-20                    | yes  |          |            |                      |           |          |           |             |                   |            |               |           |              |           |           |                       |                |                         |            |                               |
| Sep-20                    | yes  |          |            |                      |           |          |           |             |                   |            |               |           |              |           |           |                       |                |                         |            |                               |
| Sep-20                    | yes  |          |            |                      |           |          |           |             |                   |            |               |           |              |           |           |                       |                |                         |            |                               |
| Oct-20                    | yes  |          |            |                      |           |          |           |             |                   |            |               |           |              |           |           |                       |                |                         |            |                               |
| Oct-20                    | yes  |          |            |                      |           |          |           |             |                   |            |               |           |              |           |           |                       |                |                         |            |                               |
| Oct-20                    | yes  |          |            |                      |           |          |           |             |                   |            |               |           |              |           |           |                       |                |                         |            |                               |
| Dec-20                    | no   |          |            |                      |           |          |           |             |                   |            |               |           |              |           |           |                       |                |                         |            |                               |
| Jan-21                    | no   |          |            |                      |           |          |           |             |                   |            |               |           |              |           |           |                       |                |                         |            |                               |
| Mar-21                    | yes  |          |            |                      |           |          |           |             |                   |            |               |           |              |           |           |                       |                |                         |            |                               |
| Mar-21                    | yes  |          |            |                      |           |          |           |             |                   |            |               |           |              |           |           |                       |                |                         |            |                               |
| Apr-21                    | yes  |          |            |                      |           |          |           |             |                   |            |               |           |              |           |           |                       |                |                         |            |                               |
| Aug-21                    | yes  |          |            |                      |           |          |           |             |                   |            |               |           |              |           |           |                       |                |                         |            |                               |
| Sep-21                    | no   |          |            |                      |           |          |           |             |                   |            |               |           |              |           |           |                       |                |                         |            |                               |
| Apr-22                    | no   |          |            |                      |           |          |           |             |                   |            |               |           |              |           |           |                       |                |                         |            |                               |
| May-22                    | no   |          |            |                      |           |          |           |             |                   |            |               |           |              |           |           |                       |                |                         |            |                               |
| green                     |      |          |            |                      |           |          |           |             |                   |            |               |           |              |           |           |                       |                |                         |            |                               |
| yellow                    |      |          |            |                      |           |          |           |             |                   |            |               |           |              |           |           |                       |                |                         |            |                               |
| red                       |      |          |            |                      |           |          |           |             |                   |            |               |           |              |           |           |                       |                |                         |            |                               |

**Table S3. Antimicrobial resistance genes identified in the sequenced *Klebsiella* isolate genomes.**

| Isolate ID                          | B8142334, B9236220 | C2042673      | C4023081       | C5012365       | 20210909B1  | D7091294     |
|-------------------------------------|--------------------|---------------|----------------|----------------|-------------|--------------|
| <b>Date of isolation (mon-year)</b> | Sep-20 & Oct-20    | Jan-21        | Mar-21         | Apr-21         | Sep-21      | Apr-22       |
| <b>Total AMR genes</b>              | 18                 | 5             | 21             | 19             | 6           | 3            |
| <b>AMR genes</b>                    | oqxA_1             | oqxA_1        | oqxA_1         | oqxA_1         | oqxA_1      | mdf(A)_1     |
|                                     | oqxB_1             | oqxB_1        | oqxB_1         | oqxB_1         | oqxB_1      | blaSHV-145_1 |
|                                     | blaSHV-106_1       | blaSHV-187_1  | blaSHV-187_1   | blaSHV-187_1   | blaSHV-27_1 | fosA_3       |
|                                     | fosA6_1            | fosA_5        | fosA6_1        | fosA6_1        | fosA6_1     |              |
|                                     | mdf(A)_1           | mdf(A)_1      | mdf(A)_1       | mdf(A)_1       | mdf(A)_1    |              |
|                                     | su12_2             |               | su12_2         | su12_2         | fosA7_1     |              |
|                                     | aph(3'')-Ib_5      |               | aph(3'')-Ib_5  | aph(3'')-Ib_5  |             |              |
|                                     | aph(6)-Id_1        |               | aph(6)-Id_1    | aph(6)-Id_1    |             |              |
|                                     | blaTEM-1B_1        |               | blaTEM-1B_1    | blaTEM-1B_1    |             |              |
|                                     | blaCTX-M-15_1      |               | blaCTX-M-15_1  | blaCTX-M-15_1  |             |              |
|                                     | qnrB1_1            |               | qnrB1_1        | qnrB1_1        |             |              |
|                                     | tet(A)_6           |               | tet(A)_6       | tet(A)_6       |             |              |
|                                     | ant(3'')-Ia_1      |               | ant(3'')-Ia_1  | ant(3'')-Ia_1  |             |              |
|                                     | dfrA14_5           |               | dfrA14_5       | dfrA14_5       |             |              |
|                                     | aac(3)-IIa_1       |               | aac(3)-IIa_1   | aac(3)-IIa_1   |             |              |
|                                     | aac(6)-Ib-cr_1     |               | aac(6)-Ib-cr_1 | aac(6)-Ib-cr_1 |             |              |
|                                     | blaOXA-1_1         |               | blaOXA-1_1     | blaOXA-1_1     |             |              |
|                                     | catB3_1            |               | catB3_1        | catB3_1        |             |              |
|                                     |                    | fosA7_1       | fosA7_1        |                |             |              |
|                                     |                    | aadA1_4       |                |                |             |              |
|                                     |                    | aph(3'')-Ia_1 |                |                |             |              |

**Table S4. Bacterial counts and 16s DNA based identification of colonies representing different morphologies.**

| Urine sample timing              | Bacterial counts in urine (CFU/mL) | Identification of representative colonies |
|----------------------------------|------------------------------------|-------------------------------------------|
| One week prior to phage therapy) | NA                                 | <i>Klebsiella pneumoniae</i>              |
|                                  |                                    | <i>Klebsiella pneumoniae</i>              |
| Day 1 of phage therapy           | 1.00E+04                           | NA (failed sequencing)                    |
|                                  |                                    | <i>Staphylococcus epidermidis</i>         |
|                                  |                                    | <i>Staphylococcus epidermidis</i>         |
| Day 8 phage therapy              | 1.87E+04                           | <i>Staphylococcus epidermidis</i>         |
|                                  |                                    | <i>Staphylococcus sp.</i>                 |
|                                  |                                    | <i>Staphylococcus epidermidis</i>         |
|                                  |                                    | <i>Corynebacterium amycolatum</i>         |
|                                  |                                    | <i>Corynebacterium sp.</i>                |
| Day 15 phage therapy             | 1.30E+04                           | <i>Corynebacterium amycolatum</i>         |
|                                  |                                    | <i>Staphylococcus epidermidis</i>         |
|                                  |                                    | <i>Staphylococcus sp.</i>                 |
|                                  |                                    | <i>Staphylococcus epidermidis</i>         |
|                                  |                                    | <i>Staphylococcus epidermidis</i>         |
| Day 22 phage therapy             | 6.00E+04                           | <i>Corynebacterium amycolatum</i>         |

|                      |          |                                   |
|----------------------|----------|-----------------------------------|
|                      |          | <i>Corynebacterium amycolatum</i> |
|                      |          | <i>Corynebacterium amycolatum</i> |
|                      |          | <i>Escherichia coli</i>           |
|                      |          | <i>Staphylococcus epidermidis</i> |
|                      |          | <i>Staphylococcus epidermidis</i> |
|                      |          | <i>Staphylococcus epidermidis</i> |
| Day 29 phage therapy | 2.04E+03 | <i>Corynebacterium amycolatum</i> |
|                      |          | <i>Corynebacterium jeikeium</i>   |
|                      |          | <i>Corynebacterium amycolatum</i> |
|                      |          | <i>Enterococcus faecium</i>       |

**Table S5. Microflora composition (represented as percentage breakdown) of the urine samples collected during phage treatment and determined by 16S metagenomic sequencing.**

(See additional excel file due to table size).

**Figure S1. The phylogenetic tree based on genome-wide comparison of the eight strains from this study in the context of 722 *Klebsiella* isolates.**

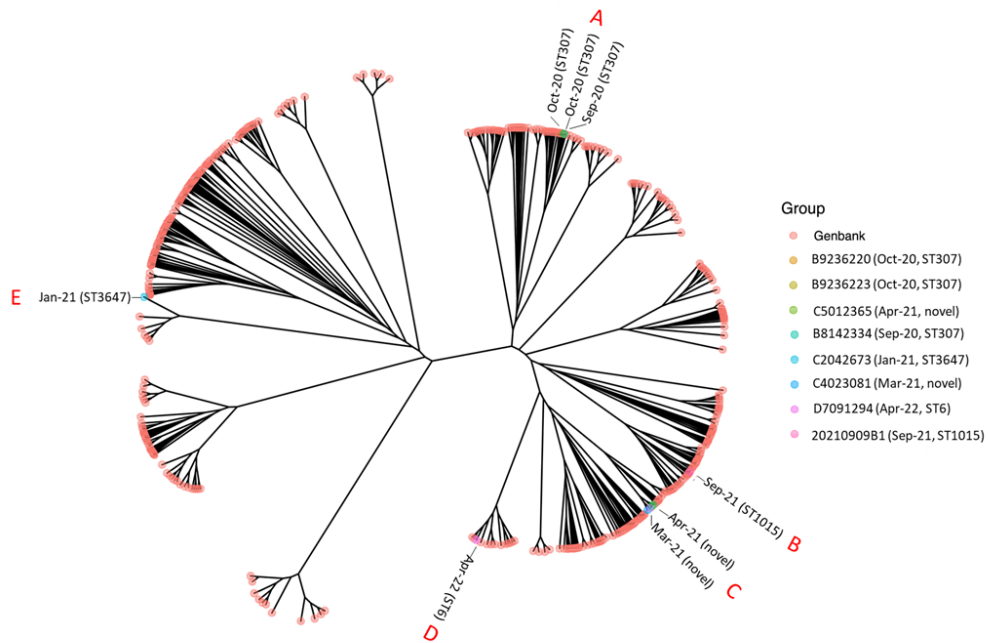

## References

1. Adams, M.K., *Bacteriophages*. 1959, New York: Interscience Publishers, Inc.
2. Bolger, A.M., M. Lohse, and B. Usadel, *Trimmomatic: a flexible trimmer for Illumina sequence data*. *Bioinformatics*, 2014. **30**(15): p. 2114-20.
3. Bankevich, A., et al., *SPAdes: a new genome assembly algorithm and its applications to single-cell sequencing*. *J Comput Biol*, 2012. **19**(5): p. 455-77.
4. Gupta, S.K., et al., *ARG-ANNOT, a new bioinformatic tool to discover antibiotic resistance genes in bacterial genomes*. *Antimicrob Agents Chemother*, 2014. **58**(1): p. 212-20.
5. Wick, R.R., et al., *Kaptive Web: User-Friendly Capsule and Lipopolysaccharide Serotype Prediction for Klebsiella Genomes*. *J Clin Microbiol*, 2018. **56**(6).
6. Jolley, K.A., J.E. Bray, and M.C.J. Maiden, *Open-access bacterial population genomics: BIGSdb software, the PubMLST.org website and their applications*. *Wellcome Open Res*, 2018. **3**: p. 124.
7. Boeckman, J.X., et al., *Complete Genome Sequence of Klebsiella pneumoniae Myophage Mineola*. *Microbiol Resour Announc*, 2019. **8**(17).
8. Groover, K.E., et al., *Complete Genome Sequence of Klebsiella aerogenes Myophage Metamorpho*. *Microbiol Resour Announc*, 2021. **10**(5).
9. Ramsey, J., et al., *Galaxy and Apollo as a biologist-friendly interface for high-quality cooperative phage genome annotation*. *PLoS Comput Biol*, 2020. **16**(11): p. e1008214.
10. Darling, A.E., B. Mau, and N.T. Perna, *progressiveMauve: multiple genome alignment with gene gain, loss and rearrangement*. *PLoS One*, 2010. **5**(6): p. e11147.
11. Schooley, R.T., et al., *Development and Use of Personalized Bacteriophage-Based Therapeutic Cocktails To Treat a Patient with a Disseminated Resistant Acinetobacter baumannii Infection*. *Antimicrob Agents Chemother*, 2017. **61**(10).
12. Zhang, Y., et al., *PKSolver: An add-in program for pharmacokinetic and pharmacodynamic data analysis in Microsoft Excel*. *Comput Methods Programs Biomed*, 2010. **99**(3): p. 306-14.
13. Bolyen, E., et al., *Reproducible, interactive, scalable and extensible microbiome data science using QIIME 2*. *Nat Biotechnol*, 2019. **37**(8): p. 852-857.
14. Quast, C., et al., *The SILVA ribosomal RNA gene database project: improved data processing and web-based tools*. *Nucleic Acids Res*, 2013. **41**(Database issue): p. D590-6.
15. Rognes, T., et al., *VSEARCH: a versatile open source tool for metagenomics*. *PeerJ*, 2016. **4**: p. e2584.
16. Adriaenssens, E.M., et al., *Taxonomy of prokaryotic viruses: 2016 update from the ICTV bacterial and archaeal viruses subcommittee*. *Arch Virol*, 2017. **162**(4): p. 1153-1157.
17. Xie, Y., L. Wahab, and J.J. Gill, *Development and Validation of a Microtiter Plate-Based Assay for Determination of Bacteriophage Host Range and Virulence*. *Viruses*, 2018. **10**(4).
